# Supplementary material for: Exposure to Stress and the Burnout Syndrome in Healthcare Workers, Expert Workers, Professional Associates and Associates in Social Service Institutions
Source: Preprints.org preprint supplement (doi:10.20944/preprints202402.0531.v1), 2024-02-08
Supplement: Supplementary file 1 [file supplementary]

Датум: 23.01.20223.године

БР.88

Комисија за одобрење едукација и истраживања

доноси ОДЛУКУ којом

се одобрава захтев Снежане Марковић за укључивање професионалаца Центра за заштиту одојчади, деце и омладине у истраживање „Изложеност стресу и синдром сагоревања на раду код здравствених радника и сарадника у установама социјалне заштите“ у оквиру докторске дисертације пријављене на Факултету медицинских наука у Крагујевцу.

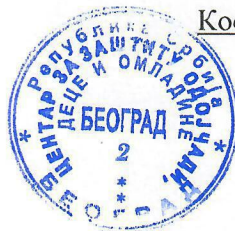

Координатор стручног савета

  
Коста Гајић
