# Supplementary material for: Exposure to Stress and the Burnout Syndrome in Healthcare Workers, Expert Workers, Professional Associates and Associates in Social Service Institutions
Source: Preprints.org preprint supplement (doi:10.20944/preprints202402.0531.v1), 2024-02-08
Supplement: Supplementary file 2 [file supplementary]

Установа за децу и младе „Сремчица“  
Моштаничка 2, Београд  
Број:  
Дтаум:

РЕПУБЛИКА СРБИЈА  
УСТАНОВА ЗА ДЕЦУ И МЛАДЕ  
„СРЕМЧИЦА“  
Број 423  
27 JAN 2023 20  
СРЕМЧИЦА

## САГЛАСНОСТ

Даје се сагласност Снежани Марковић, докторанду на Факултету медицинских наука Универзитета у Крагујевцу, да спроведе истраживање у циљу израде докторске дисертације на тему «Изложеност стресу и синдром сагоревања на раду код здравствених радника и здравствених сарадника у установама специјалне заштите» на Факултету медицинских наука Универзитета у Крагујевцу.

## Образложење

Снежана Марковић се обратила Установи за децу и младе „Сремчица“, дана 24.01.2023. године, Молбом заведеном под бројем 330 и у прилогу доставила протокол студије и сву непоходну документацију на увид која ће се користити за истраживање.

Увидом у исте утврђено је да се истраживањем не нарушава поштовања приватности субјекта истраживања и поверљивости информација те да ће се истраживање бити анонимно и спроведено уз добровољни пристанак испитаника.

Истраживач је дужан да у току реализације истраживања предузме све неопходне кораке у складу са Законом о заштити података о личности („Сл. гласник РС“, бр. 97/08, 104/09), Законом о званичној статистици („Сл. гласник РС“, бр. 104/09) и директивом Европског парламента о заштити личности у вези са личним подацима (Directive 95/46/EC).

У Београду,  
27.01.2023. године.

директор  
др Марина Видојевић
