# Supplementary material for: Exposure to Stress and the Burnout Syndrome in Healthcare Workers, Expert Workers, Professional Associates and Associates in Social Service Institutions
Source: Preprints.org preprint supplement (doi:10.20944/preprints202402.0531.v1), 2024-02-08
Supplement: Supplementary file 3 [file supplementary]

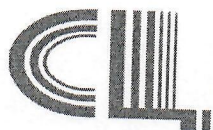

ЦЕНТАР ЗА СМЕШТАЈ  
И ДНЕВНИ БОРАВАК  
ДЕЦЕ И ОМЛАДИНЕ  
ОМЕТЕНЕ У РАЗВОЈУ

Бр.дел.

1867-1

25 APR 2023 .год.

## САГЛАСНОСТ

Даје се сагласност Снежани Марковић, докторанду на Факултету медицинских наука Универзитета у Крагујевцу, да спроведе истраживање у циљу израде докторске дисертације на тему „Изложеност стресу и синдром сагоревања на раду код здравствених радника и здравствених сарадника у установама социјалне заштите“ на Факултету медицинских наука Универзитета у Крагујевцу.

## Образложење

Снежана Марковић се обратила Центру за смештај и дневни боравак деце и омладине ометене у развоју, Београд, дана 25.04.2023., Молбом заведеном под бројем 1867 и у прилогу доставила протокол студије и сву неопходну документацију на увид која ће се користити за истраживање.

Увидом у исте утврђено је да се истраживањем не нарушава поштовање приватности субјекта истраживања и поверљивости информација, те да ће истраживање бити анонимно и спроведено уз добровољни пристанак испитаника.

Истраживач је дужан да у току реализације истраживања предузме све неопходне кораке у складу са Законом о заштити података о личности („Сл. Гласник РС“, бр. 87/2018) и Законом о званичној статистици („Сл. Гласник РС“, бр 104/09).

Директор Центра

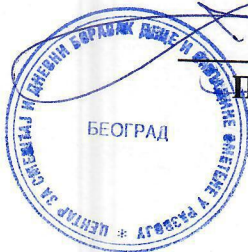

Петар Јорданов
