# Supplementary material for: Exposure to Stress and the Burnout Syndrome in Healthcare Workers, Expert Workers, Professional Associates and Associates in Social Service Institutions
Source: Preprints.org preprint supplement (doi:10.20944/preprints202402.0531.v1), 2024-02-08
Supplement: Supplementary file 4 [file supplementary]

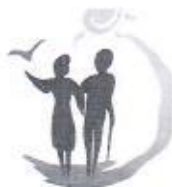

Број: 03064-401

Датум: 09 FEB 2023

Тел./ факс +38111/ 2602-653, 2604-928

Централа: +38111/ 2695-605

Лиценца бр.0001 Услуга домског смештаја

Лиценца бр.0002 Услуга помоћи у кући

На основу чл. 42. Статута Установе Геронтолошки центар Београд, доносим следећу

### ОДЛУКУ

I Даје се сагласност Снежани Марковић из Београда, докторанду на Факултету медицинских наука Универзитета у Крагујевцу, да спроведе истраживање у циљу израде докторске дисертације на тему „Изложеност стресу и синдром сагоревања на раду код здравствених радника и здравствених сарадника у установама социјалне заштите” на Факултету медицинских наука Универзитета у Крагујевцу.

II Одлуку доставити Снежани Марковић.

### Образложење

Снежана Марковић се обратила Установи Геронтолошки центар Београд Молбом заведеном под бројем 03064-182 од 19.01.2023. године и у Прилогу доставила протокол студије и сву непоходну документацију на увид која ће се користити за истраживање

Увидом у исте утврђено је да се истраживањем поштује приватност субјекта истраживања и поверљивост информација, те да ће истраживање бити анонимно и спроведено уз добровољни пристанак испитаника.

Сагласност важи за време трајања студије.

Снежана Марковић је дужна да за време трајања студије поштује право испитаника на приватност и да од испитаника не захтева податке о личности у складу са Законом о заштити података о личности.

На основу изнетог, одлучено је као у диспозитиву.

Директор

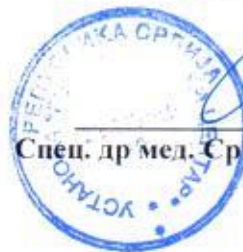

Спец. др мед. Срђан Димитријевић

Обрађивач предмета: Н. Јовановић  
Контролу вршио: др А. Михајловић  
Сагласно лице: М. Ђорђевић
